# Supplementary material for: Fluctuating environments during early development can limit adult phenotypic flexibility: Insights from an amphibious fish
Source: Oxford University Press journal article supplement (doi:10.1242/jeb.228304), 2020-01-01
Supplement: jeb228304supp.pdf [file jeb228304supp.pdf]

### Supplementary Material

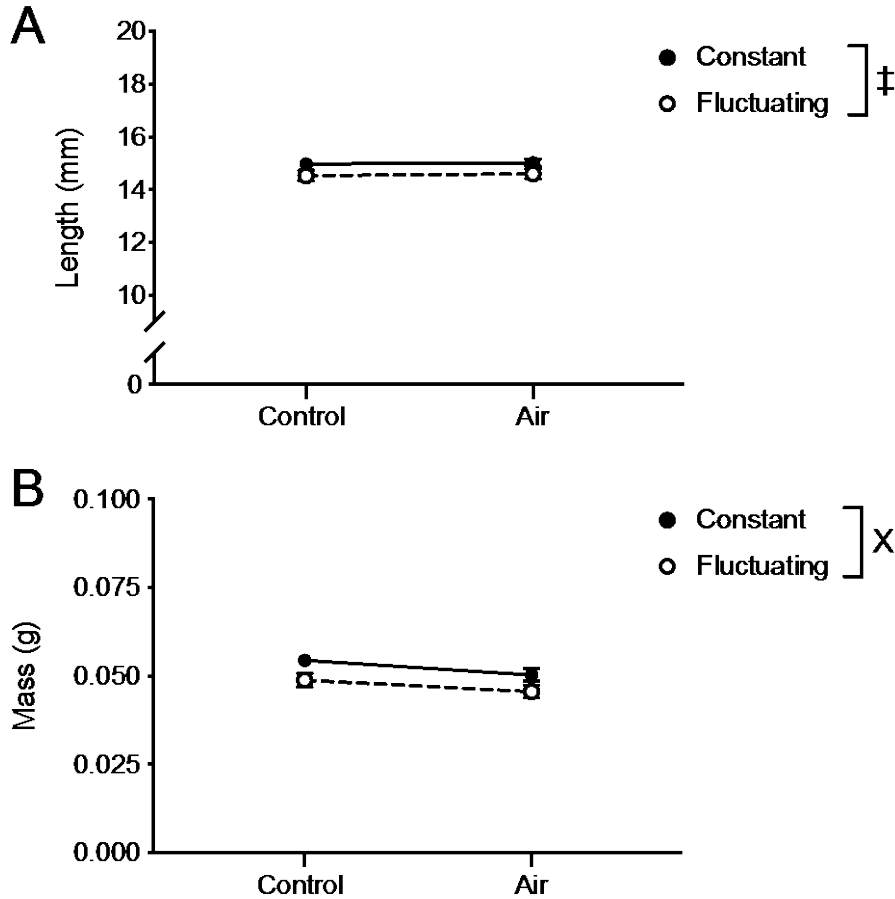

**Figure S1:** (A) The standard length and (B) mass of adult *K. marmoratus* after rearing (control), and a subsequent 14 day adult air-exposure period (air). The double dagger in the figure legend denotes a significant main effect of rearing condition (developmental plasticity). An X in the figure legend denotes a significant interaction between the rearing condition and air-exposure. When a significant interaction was detected, we compared control and air-exposed fish within each rearing group; no significant differences were detected. N=25-34 per treatment.

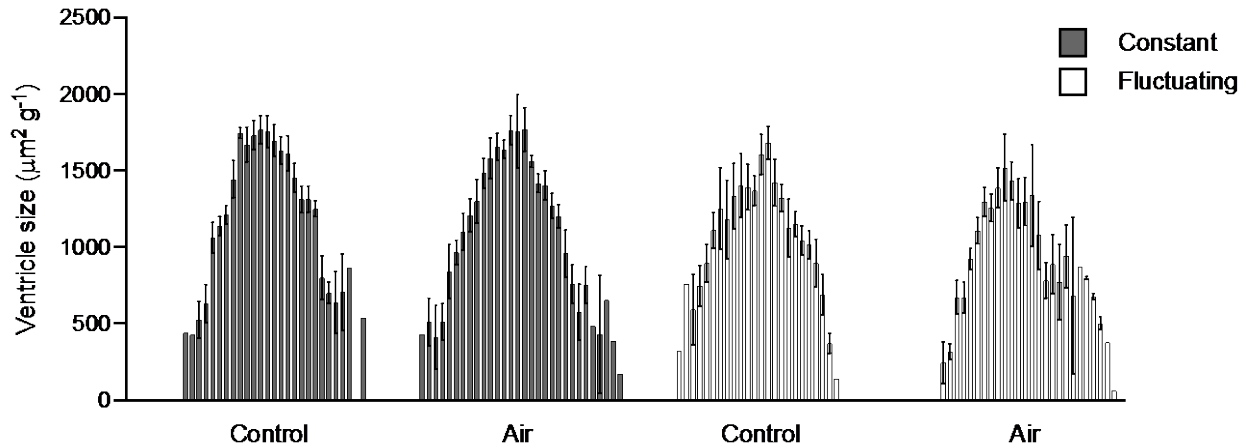

**Figure S2:** The ventricle size of *K. marmoratus* measured from all available 5µm-thick sagittal sections at 15 µm intervals through the heart (i.e., 1 in every 3 sections;  $17 \pm 3$  sections per fish). The maximum ventricle size for each treatment group was determined from the peak in their respective distribution.

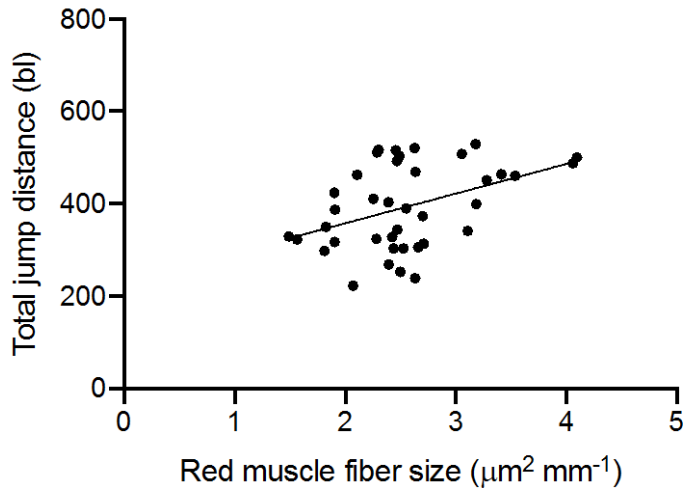

**Figure S3:** The relationship between the total distance fish travelled before exhaustion in body lengths (bl) and the red muscle fiber size. Fish with larger red muscle fibers jumped further ( $p = 0.01$ ,  $R^2 = 0.18$ ).

Dataset 1

[Click here to Download Dataset 1](#)
